# Supplementary material
Source: PubMed Central journal article supplement (PMC4594759)
Supplement: NIHMS64651-supplement-1.pdf [file NIHMS64651-supplement-1.pdf]

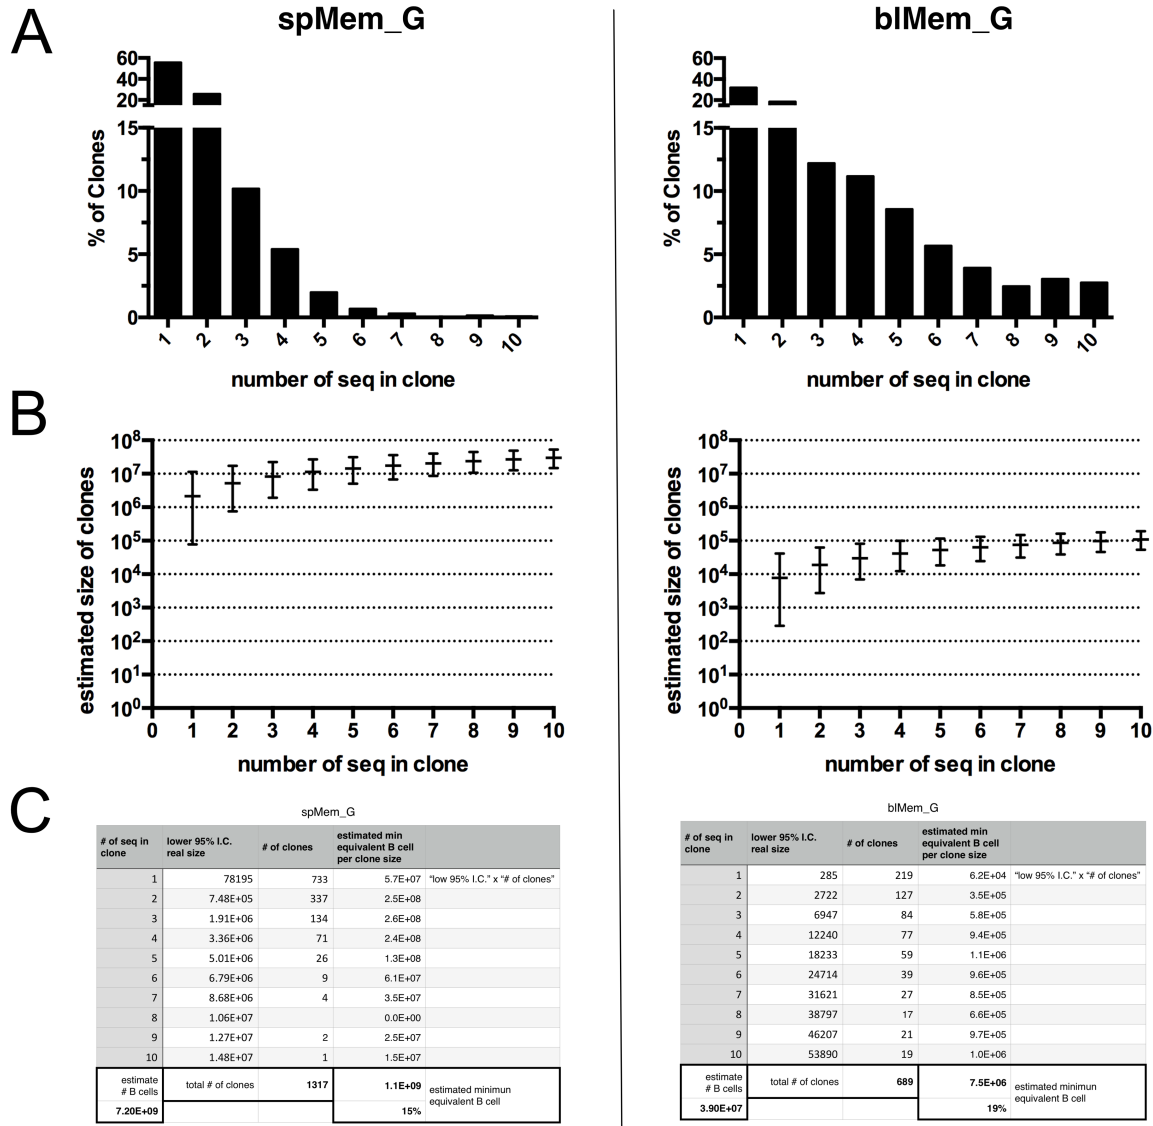

**Figure S1. Estimate of clone sizes and fraction of B cell repertoire analyzed .**

This figure describes in three steps the calculation performed for one spleen (left part) and one blood (right part) subset chosen as an example:

**A.** Distribution of clone sizes obtained by CDR3 clustering within a given subset.

**B.** Using the procedure described in Material and Methods ("Estimate of clone sizes and B cell sampling" section), the values obtained in panel A are extrapolated for the total size of the B cell subset, with error bars representing the 95% interval of confidence of the estimate.

**C.** The lower 5% values of the estimate of B cell numbers obtained in panel B are tabulated and multiplied by the number of clones in each category. The total number of cells obtained in this calculation, reported to the total size of the B cell subset considered, represents the minimal fraction of B cells within this subset that is clonally related to the sequenced sample and is listed in Table S1 ("minimum equivalent B cell fraction").

Table S1. Estimate size of B cell subsets, number of unique sequence obtained, number of sequenced clones and minimal estimate of the corresponding fraction of the B cell repertoire analyzed for three adult donors.

|         | estimated population size | number of unique sequences | number of observed clones | minimum equivalent B cell fraction (%) |
|---------|---------------------------|----------------------------|---------------------------|----------------------------------------|
| spMem_G | $7.6 \times 10^9$         | 2416                       | 1662                      | 10.7                                   |
|         | $2.7 \times 10^9$         | 2319                       | 1309                      | 21.0                                   |
|         | $7.2 \times 10^9$         | 2333                       | 1317                      | 15.0                                   |
| blMem_G | $1.2 \times 10^8$         | 1519                       | 615                       | 23.3                                   |
|         | $8.0 \times 10^7$         | 2832                       | 1783                      | 18.6                                   |
|         | $3.9 \times 10^7$         | 3473                       | 543                       | 39.3                                   |
| spMem_A | $6.8 \times 10^9$         | 2094                       | 1498                      | 10.2                                   |
|         | $2.3 \times 10^9$         | 1973                       | 1263                      | 13.3                                   |
|         | $6.1 \times 10^9$         | 1608                       | 1184                      | 9.9                                    |
| blMem_A | $1.9 \times 10^8$         | 1636                       | 835                       | 17.6                                   |
|         | $1.7 \times 10^8$         | 2741                       | 1488                      | 18.7                                   |
|         | $1.2 \times 10^8$         | 2037                       | 484                       | 44.7                                   |
| spMem_M | $1.2 \times 10^9$         | 167                        | 108                       | 11.3                                   |
|         | $1.3 \times 10^9$         | 1184                       | 626                       | 16.2                                   |
|         | $6.8 \times 10^8$         | 93                         | 72                        | 8.0                                    |
| blMem_M | $7.2 \times 10^7$         | 336                        | 136                       | 23.5                                   |
|         | $2.4 \times 10^7$         | 1762                       | 485                       | 36.9                                   |
|         | $2.3 \times 10^7$         | 119                        | 51                        | 24.2                                   |
| spMZ    | $4.5 \times 10^9$         | 4580                       | 2802                      | 12.5                                   |
|         | $1.5 \times 10^{10}$      | 1812                       | 1379                      | 8.0                                    |
|         | $1.4 \times 10^{10}$      | 10077                      | 5586                      | 13.0                                   |
| blMZ    | $5.4 \times 10^8$         | 2122                       | 1166                      | 14.4                                   |
|         | $3.9 \times 10^8$         | 11715                      | 5889                      | 18.7                                   |
|         | $5.5 \times 10^7$         | 1547                       | 534                       | 28.0                                   |
| spDN_G  | $5.6 \times 10^8$         | 2297                       | 1576                      | 11.6                                   |
|         | $4.8 \times 10^8$         | 1477                       | 1008                      | 10.8                                   |
|         | $1.5 \times 10^9$         | 2755                       | 1393                      | 16.0                                   |
| blDN_G  | $3.6 \times 10^7$         | 453                        | 130                       | 22.3                                   |
|         | $2.6 \times 10^7$         | 3553                       | 1257                      | 22.0                                   |
|         | $1.4 \times 10^7$         | 686                        | 236                       | 20.7                                   |
| spDN_A  | $3.6 \times 10^8$         | 2106                       | 1527                      | 9.6                                    |
|         | $1.6 \times 10^8$         | 479                        | 325                       | 11.4                                   |
|         | $4.3 \times 10^8$         | 1919                       | 1017                      | 16.2                                   |
| blDN_A  | $1.8 \times 10^7$         | 606                        | 134                       | 46.3                                   |
|         | $2.6 \times 10^7$         | 2416                       | 1186                      | 28.3                                   |
|         | $3.9 \times 10^7$         | 1636                       | 202                       | 60.4                                   |
| spDN_M  | $3.3 \times 10^8$         | 460                        | 222                       | 19.2                                   |
|         | $1.7 \times 10^8$         | 182                        | 156                       | 5.7                                    |
|         | $1.4 \times 10^8$         | 41                         | 39                        | 3.5                                    |
| blDN_M  | $4.7 \times 10^7$         | 21                         | 17                        | 6.2                                    |
|         | $1.3 \times 10^7$         | 1291                       | 76                        | 13.6                                   |
|         | $1.3 \times 10^7$         | 59                         | 24                        | 12.7                                   |

Table S2. Number of clones obtained that are either unique to each subset or shared by two different ones\*

|         | biMem_A | spMem_A | biMem_G | spMem_G | biMem_M | spMem_M | biMZ | spMZ | biDN_A | spDN_A | biDN_G | spDN_G | biDN_M | spDN_M |
|---------|---------|---------|---------|---------|---------|---------|------|------|--------|--------|--------|--------|--------|--------|
| biMem_A | 2806    | 190     | 34      | 12      | 7       | 8       | 29   | 24   | 472    | 79     | 2      | 2      |        |        |
| spMem_A |         | 3945    | 16      | 31      | 8       | 8       | 36   | 37   | 67     | 189    | 3      | 3      |        | 2      |
| biMem_G |         |         | 3161    | 161     | 5       | 5       | 25   | 22   | 27     | 7      | 36     | 42     |        | 1      |
| spMem_G |         |         |         | 4287    | 3       | 4       | 18   | 19   | 7      | 6      | 22     | 78     | 1      |        |
| biMem_M |         |         |         |         | 672     | 43      | 85   | 37   | 3      | 2      |        |        | 4      | 13     |
| spMem_M |         |         |         |         |         | 806     | 97   | 56   | 3      |        | 1      | 1      | 1      | 13     |
| biMZ    |         |         |         |         |         |         | 7589 | 552  | 14     | 6      | 4      | 4      | 2      | 30     |
| spMZ    |         |         |         |         |         |         |      | 9767 | 8      | 18     | 7      | 5      | 3      | 36     |
| biDN_A  |         |         |         |         |         |         |      |      | 1522   | 44     | 12     | 1      |        |        |
| spDN_A  |         |         |         |         |         |         |      |      |        | 2869   | 8      | 17     |        |        |
| biDN_G  |         |         |         |         |         |         |      |      |        |        | 1624   | 91     |        |        |
| spDN_G  |         |         |         |         |         |         |      |      |        |        |        | 3977   |        |        |
| biDN_M  |         |         |         |         |         |         |      |      |        |        |        |        | 243    | 8      |
| spDN_M  |         |         |         |         |         |         |      |      |        |        |        |        |        | 417    |

Analysis is performed for each donor separately, and the number of clones obtained in each category is pooled for the three donors

\*Numbers in the diagonal represent clones unique to this subset. Numbers outside of the diagonal are clones shared by the two corresponding subsets: since clones can be shared between more than two subsets, the sum of these numbers is bigger than the total number of shared clones.

Table S3. Analysis of statistical significance of repertoire comparisons reported in Figures 5 and 6

|            |              |                             | mut             |                 | CDR3    | VH  | JH  |
|------------|--------------|-----------------------------|-----------------|-----------------|---------|-----|-----|
|            |              |                             | MZ              | Mem_M           |         |     |     |
| Fig 5A     | (Mem_M/MZ)   | Mem_M                       | ns              | ns              | ns      | ns  | ns  |
|            |              | MZ                          | ***             | ***             | ns      | *** | *** |
|            |              | Mem_M                       | Mem_M           |                 |         |     |     |
|            | (Mem_M/DN_M) | Mem_M                       | ns              | ns              | ns      | ns  | ns  |
|            |              | DN_M                        | ***             | ***             | ns      | ns  | *   |
|            |              |                             | MZ              | DN_M            |         |     |     |
|            | (MZ/DN_M)    | MZ                          | **              | ***             | ns      | ns  | *** |
|            |              | DN_M                        | ***             | ***             | ns      | ns  | **  |
|            |              | Mem_M                       | ns              | ns              | ns      | ns  | ns  |
|            | Fig 5B       | (MemM/Mem_A-G) <sup>a</sup> | Mem_M           | Mem_M           | Mem_A-G |     |     |
| Mem_M      |              |                             | ns              | **              | ns      | ns  | ns  |
| (MZ/Mem_A) |              | MZ                          | Mem_M           | Mem_A           |         |     |     |
|            |              | Mem_A                       | ***             | ***             | ns      | *** | ns  |
|            |              | Mem_M                       | ***             | ns              | ns      | *   | ns  |
| (MZ/Mem_G) |              | MZ                          | MZ              | Mem_G           |         |     |     |
|            |              | Mem_G                       | ***             | ***             | ns      | *** | ns  |
|            |              | Mem_M                       | ***             | ns              | *       | **  | ns  |
|            |              |                             | Mem_M           | ns              | ***     | ns  | ns  |
| Fig 5C     |              | (MZ/DN_A)                   | MZ              | MZ              | DN_A    |     |     |
|            | MZ           |                             | ns              | ***             | ns      | ns  | ns  |
|            | DN_A         |                             | ***             | ns              | ns      | ns  | ns  |
|            |              |                             | Mem_M           | *               | ns      | ns  | *** |
|            | (MZ/DN_G)    | MZ                          | MZ              | DN_G            |         |     |     |
|            |              | MZ                          | ns <sup>b</sup> | ns <sup>b</sup> | **      | ns  | ns  |
|            |              | DN_G                        | ns <sup>b</sup> | ns <sup>b</sup> | ns      | ns  | ns  |
|            |              | Mem_M                       | * <sup>b</sup>  | ns <sup>b</sup> | *       | ns  | ns  |

  

|        |              |    | mut |     | CDR3 | VH  | JH |
|--------|--------------|----|-----|-----|------|-----|----|
|        |              |    | bl  | sp  |      |     |    |
| Fig 6A | Mem_A(bl/sp) | bl | *** | *** | ns   | *** | ns |
|        |              | sp | ns  | ns  | ns   | ns  | ns |
|        |              | bl | bl  | sp  |      |     |    |
|        | Mem_G(bl/sp) | bl | ns  | ns  | ns   | *** | ns |
|        |              | sp | *   | ns  | ns   | ns  | ns |
|        |              |    |     |     |      |     |    |
| Fig 6B | Mem_M(bl/sp) | bl | bl  | sp  |      |     |    |
|        |              | sp | ns  | ns  | ns   | ns  | ns |
|        |              | sp | **  | ns  | ns   | ns  | ns |
|        | MZ(bl/sp)    | bl | bl  | sp  |      |     |    |
|        |              | bl | *** | ns  | ns   | ns  | ns |
|        |              | sp | *** | *** | ns   | *** | ns |

<sup>a</sup> statistics are shown for pooled Mem\_A and Mem\_G samples

<sup>b</sup> statistics calculated on the mean mutation frequency and not on the mutation distribution because of the small sample size
